# Supplementary material
Source: publisher figshare collection journal article supplement (https://acs.figshare.com/ndownloader/files/4849705)
Supplement: Supplementary file 1 [file 4849705]

## SUPPORTING INFORMATION

Design of ionizable lipids to overcome the limiting step of endosomal escape - Application in the intracellular delivery of mRNA, DNA and siRNA.

*Damien Habrant,<sup>†,§</sup> Pauline Peuziat,<sup>‡,§</sup> Thibault Colombani,<sup>‡</sup> Laurence Dallet,<sup>#</sup> Johan Gehin,<sup>†</sup>  
Emilie Goudeau,<sup>†</sup> Bérangère Evrard,<sup>†</sup> Olivier Lambert,<sup>#</sup> Thomas Haudebourg,<sup>‡</sup> Bruno Pitard<sup>\*,†,‡</sup>*

## Table of Content

|                                                                                                                                                 |     |
|-------------------------------------------------------------------------------------------------------------------------------------------------|-----|
| Figure S1: $^1\text{H}$ NMR spectrum of <b>13</b>                                                                                               | S4  |
| Figure S2: $^{13}\text{C}$ NMR spectrum of <b>13</b>                                                                                            | S5  |
| Figure S3: $^1\text{H}$ NMR spectrum of <b>20a</b>                                                                                              | S6  |
| Figure S4: $^{13}\text{C}$ NMR spectrum of <b>20a</b>                                                                                           | S7  |
| Figure S5: $^1\text{H}$ NMR spectrum of <b>20b</b>                                                                                              | S8  |
| Figure S6: $^{13}\text{C}$ NMR spectrum of <b>20b</b>                                                                                           | S9  |
| Figure S7: $^1\text{H}$ NMR spectrum of <b>20c</b>                                                                                              | S10 |
| Figure S8: $^{13}\text{C}$ NMR spectrum of <b>20c</b>                                                                                           | S11 |
| Figure S9: $^1\text{H}$ NMR spectrum of <b>24a</b>                                                                                              | S12 |
| Figure S10: $^{13}\text{C}$ NMR spectrum of <b>24a</b>                                                                                          | S13 |
| Figure S11: $^1\text{H}$ NMR spectrum of <b>24b</b>                                                                                             | S14 |
| Figure S12: $^{13}\text{C}$ NMR spectrum of <b>24b</b>                                                                                          | S15 |
| Figure S13: $^1\text{H}$ NMR spectrum of <b>24c</b>                                                                                             | S16 |
| Figure S14: $^{13}\text{C}$ NMR spectrum of <b>24c</b>                                                                                          | S17 |
| Figure S15: $^1\text{H}$ NMR spectrum of <b>24d</b>                                                                                             | S18 |
| Figure S16: $^{13}\text{C}$ NMR spectrum of <b>24d</b>                                                                                          | S19 |
| Figure S17: $^1\text{H}$ NMR spectrum of <b>30</b>                                                                                              | S20 |
| Figure S18: $^{13}\text{C}$ NMR spectrum of <b>30</b>                                                                                           | S21 |
| Figure S19: <i>In vitro</i> transfection of plasmid DNA encoding luciferase on HeLa cell line with <b>13</b> , <b>30</b> and Lipofectamine 3000 | S22 |
| Figure S20: <i>In vitro</i> transfection of mRNA encoding luciferase on HeLa cell line with <b>13</b> , <b>30</b> and Lipofectamine 3000        | S22 |

Figure S21: Inhibition of LaminA/C expression on HeLa cell line with **13**, **30** and Lipofectamine  
3000 S23

Figure S22: Percentage of cell survival on HeLa cell line with **13**, **30** and Lipofectamine  
3000 S23

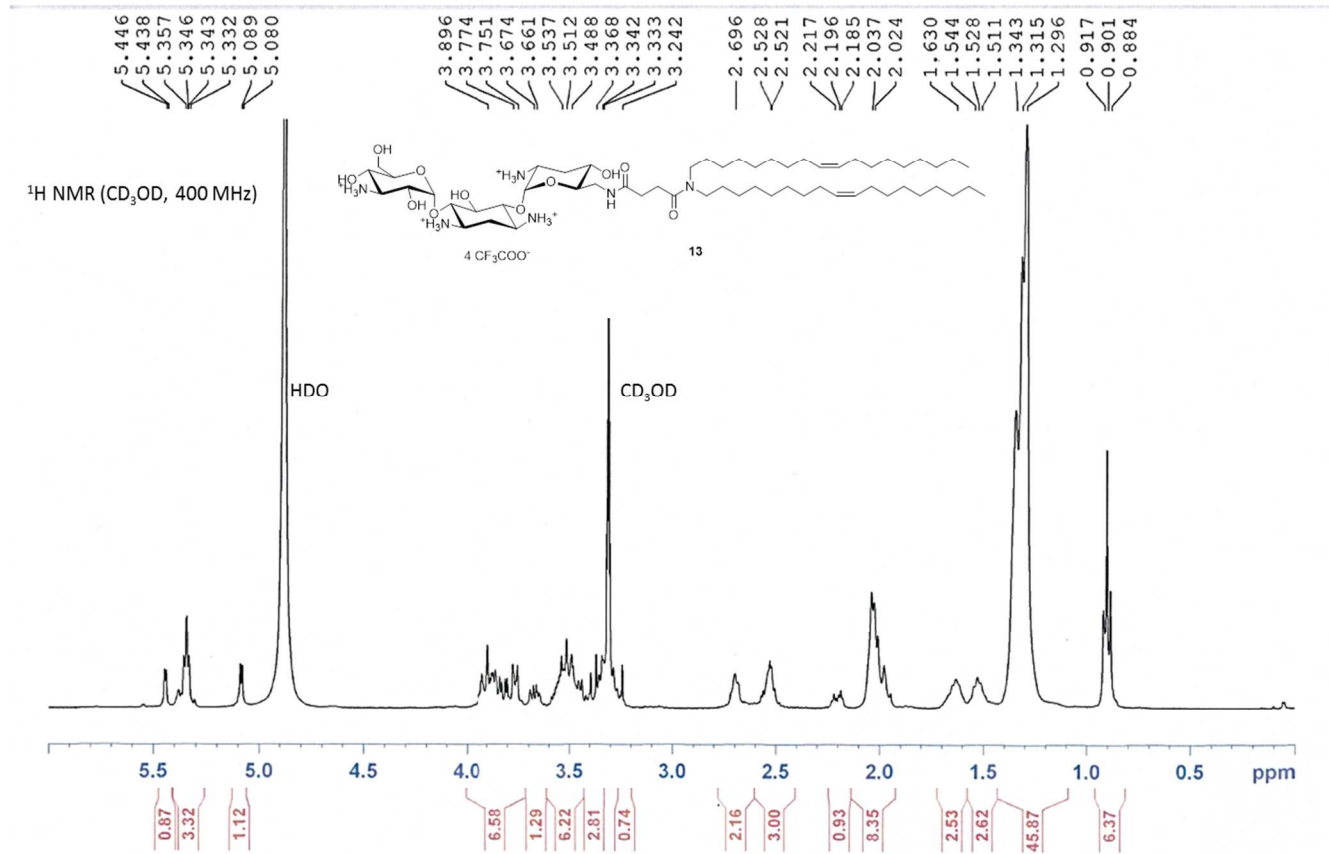

**Figure S1:**  $^1\text{H}$  NMR spectrum of **13**

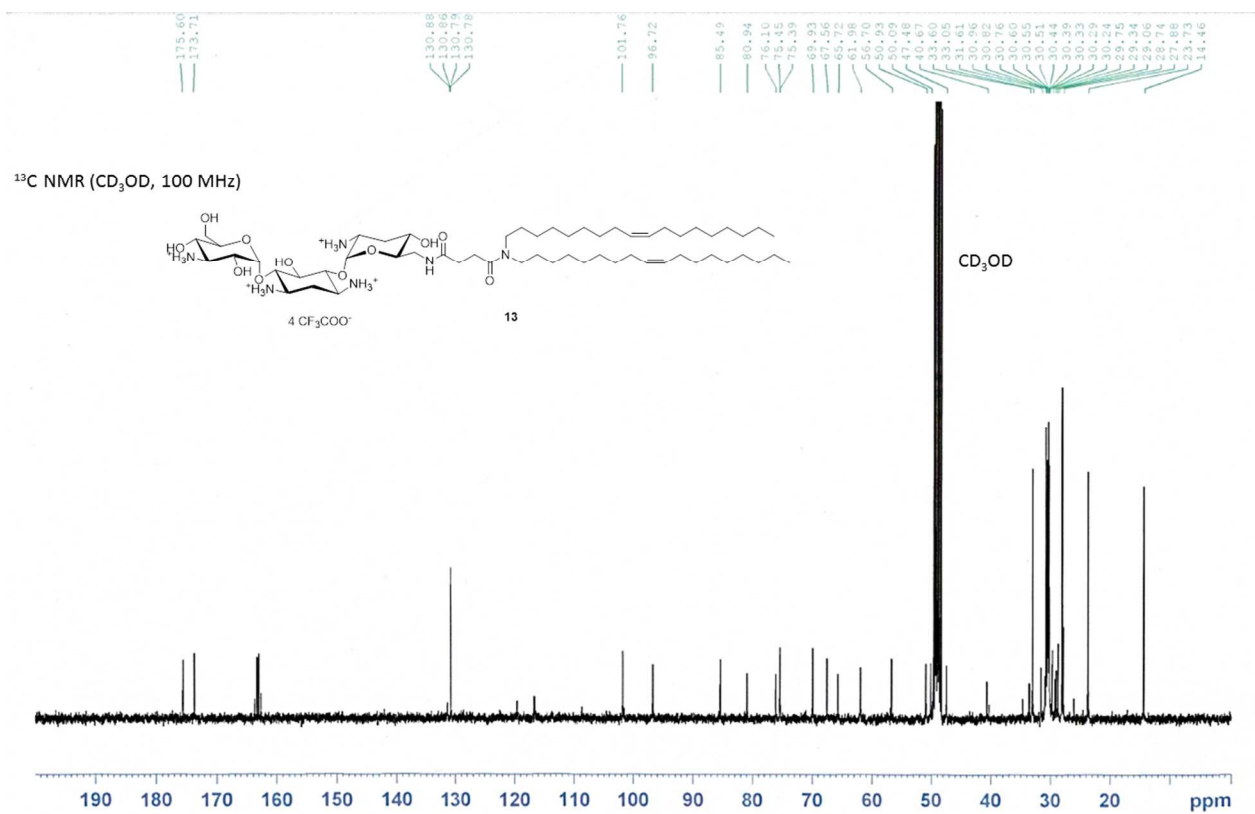

**Figure S2:**  $^{13}\text{C}$  NMR spectrum of **13**

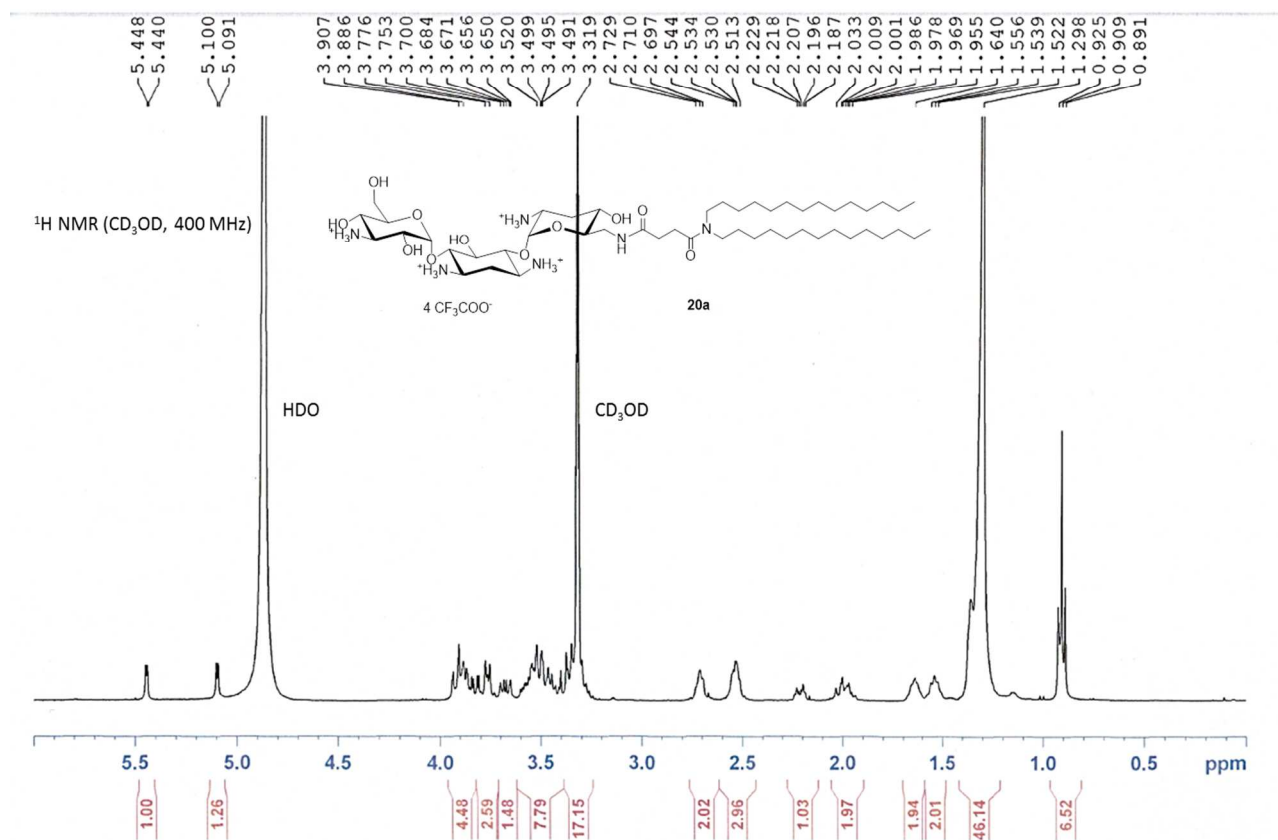

**Figure S3:**  $^1\text{H}$  NMR spectrum of **20a**

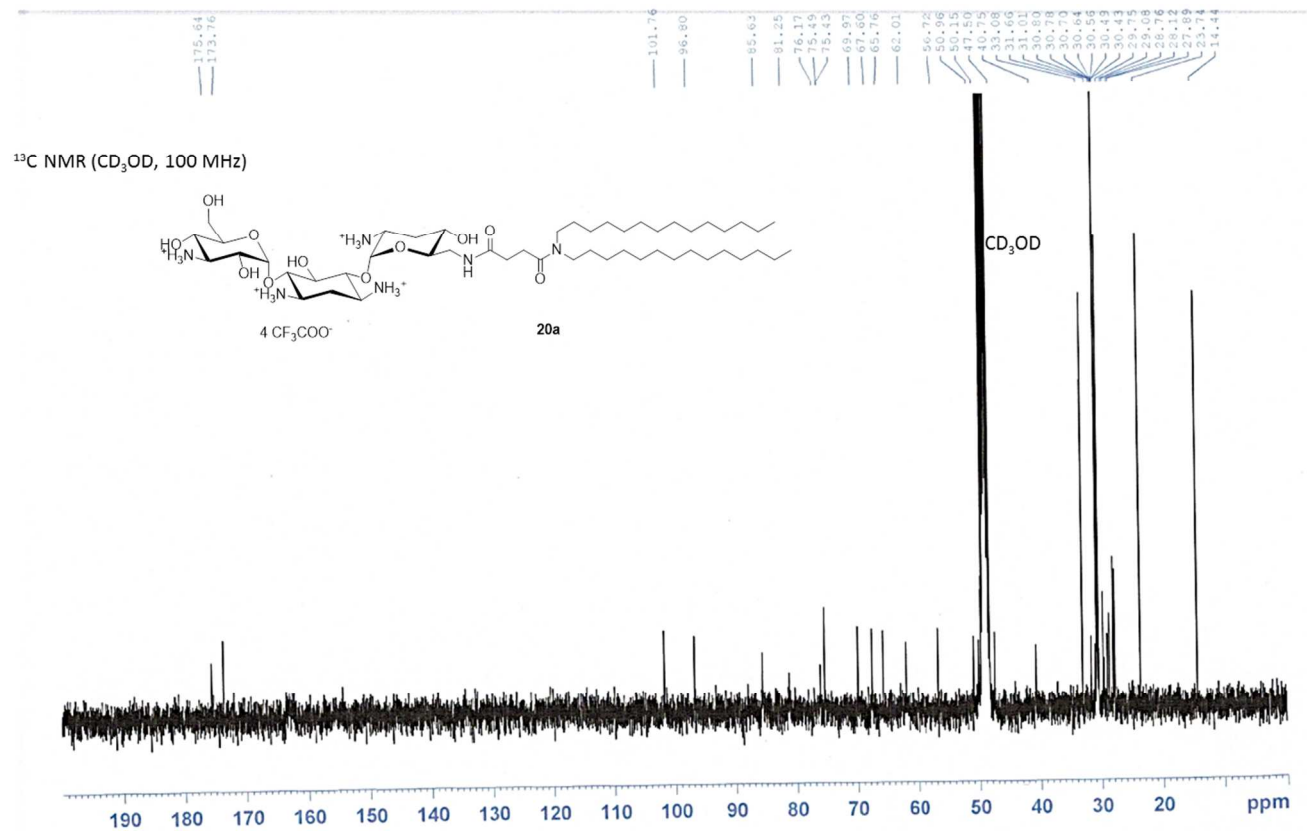

**Figure S4:** <sup>13</sup>C NMR spectrum of **20a**

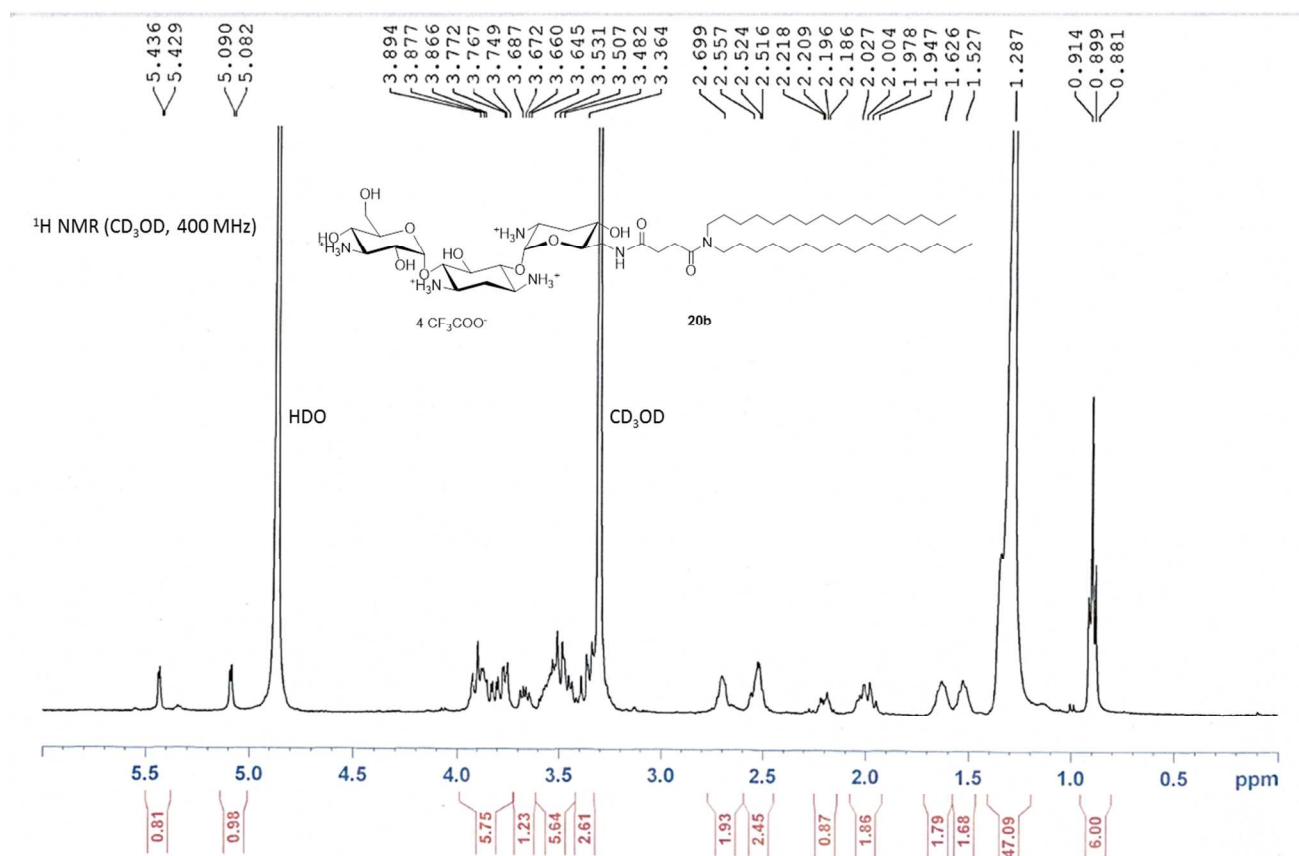

**Figure S5:** <sup>1</sup>H NMR spectrum of **20b**



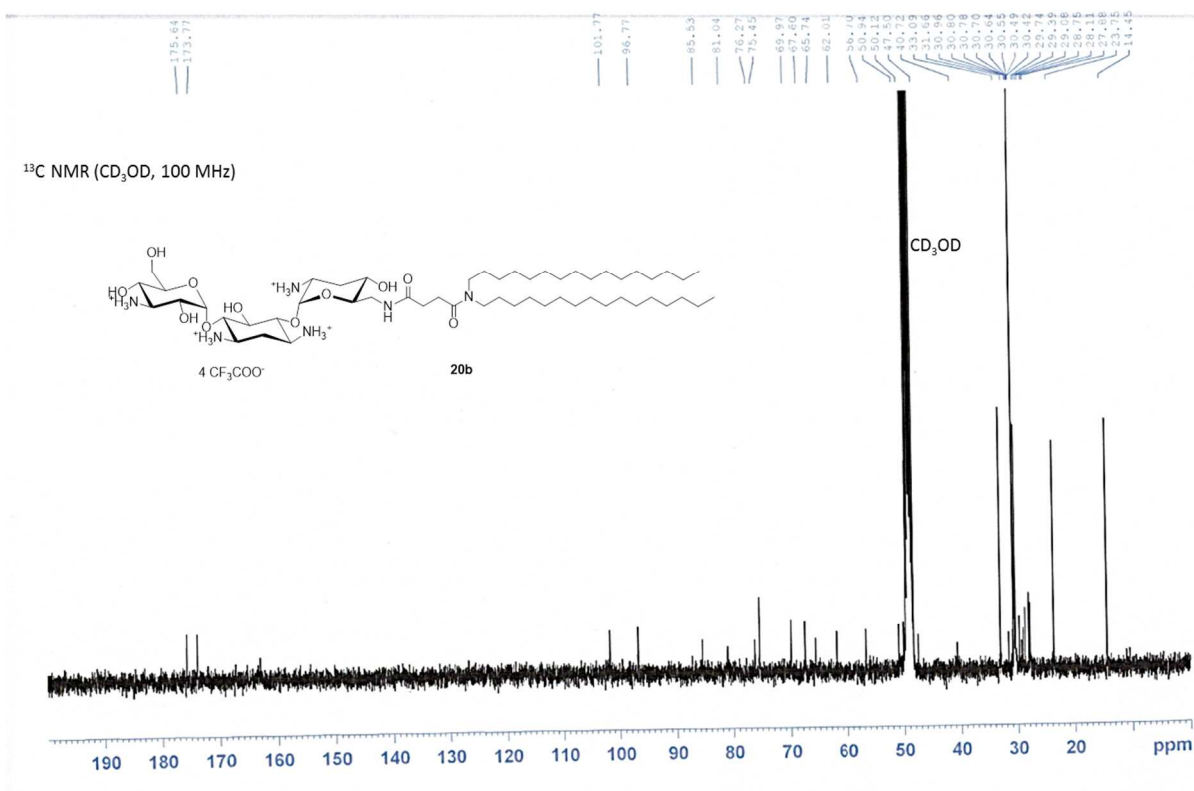

**Figure S6:**  $^{13}\text{C}$  NMR spectrum of **20b**

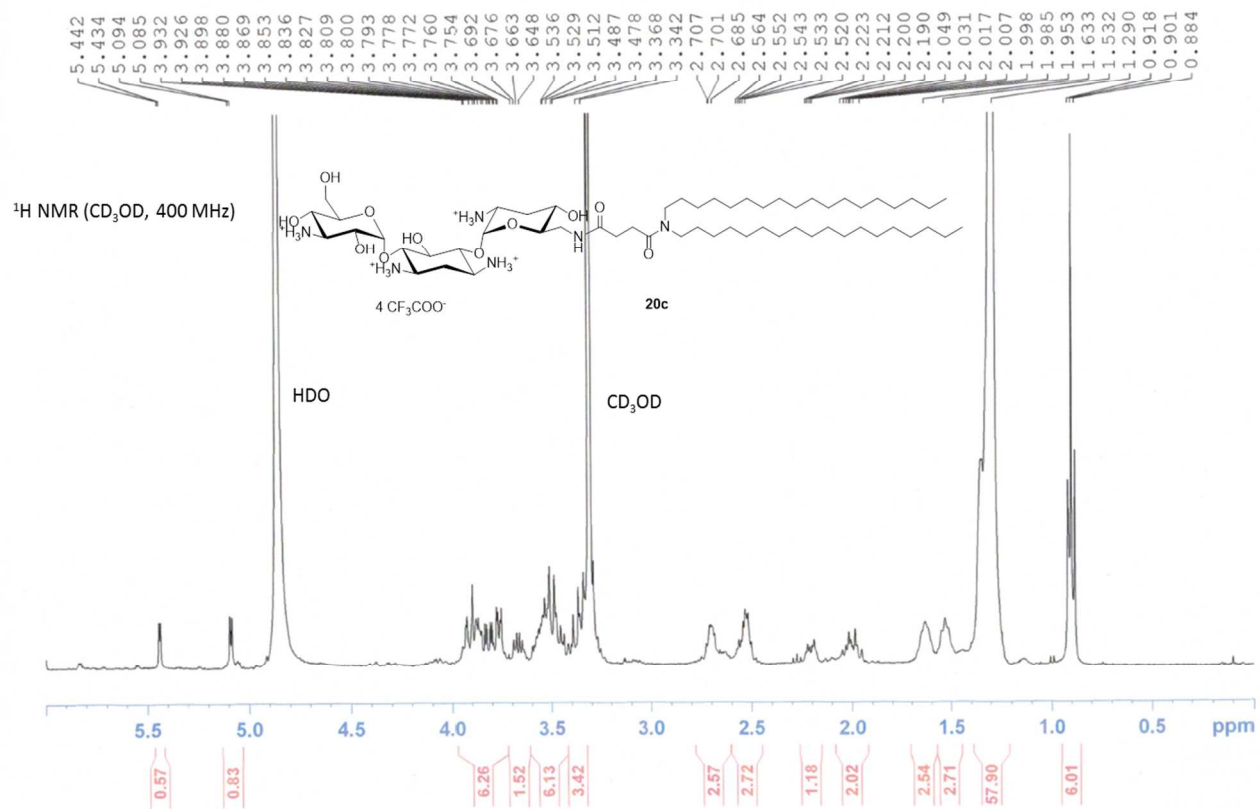

**Figure S7:**  $^1\text{H}$  NMR spectrum of **20c**

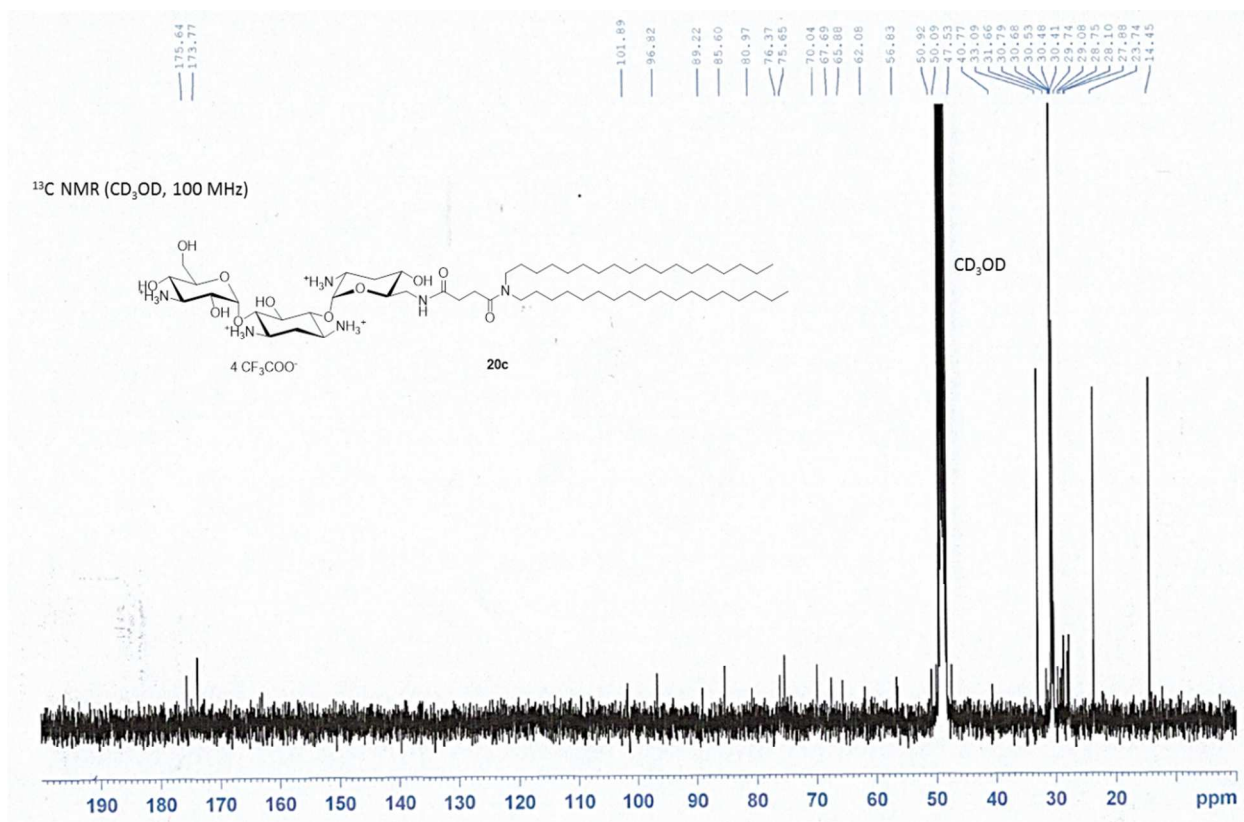

**Figure S8:** <sup>13</sup>C NMR spectrum of **20c**

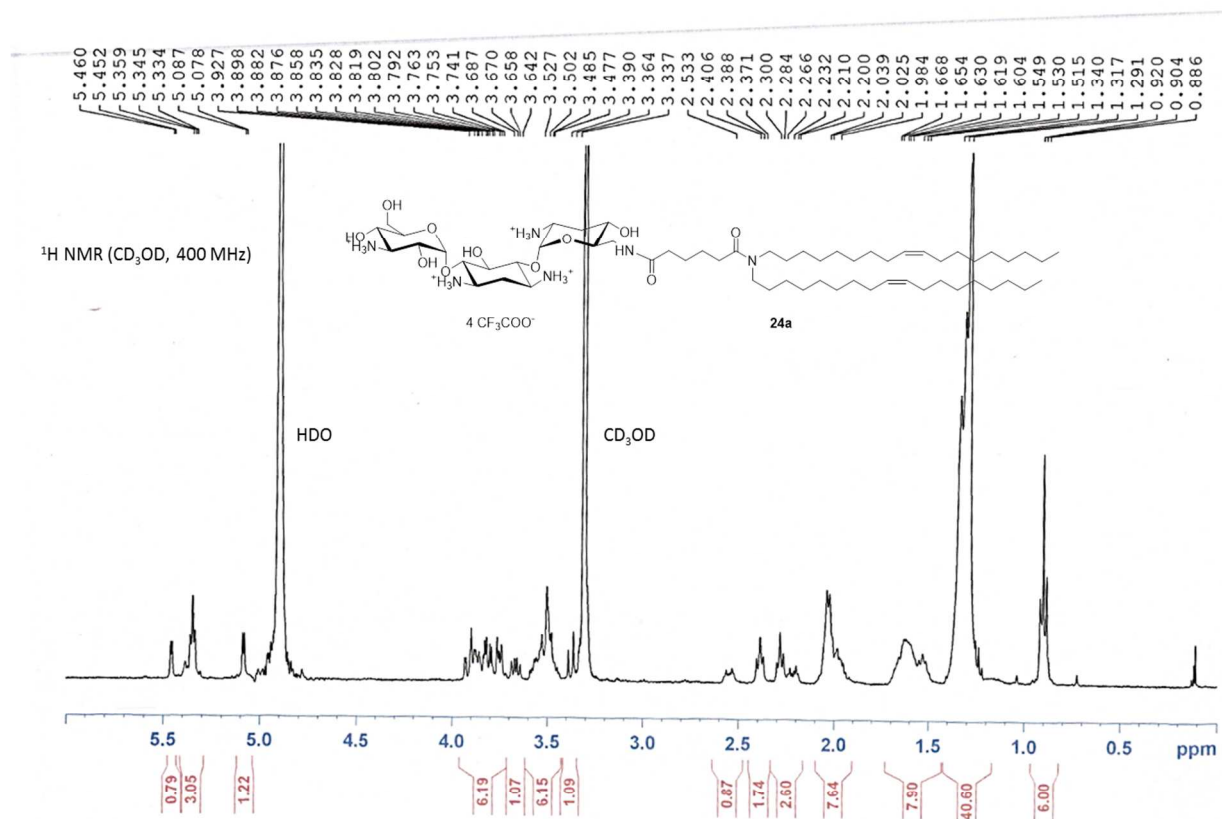

**Figure S9:** <sup>1</sup>H NMR spectrum of **24a**



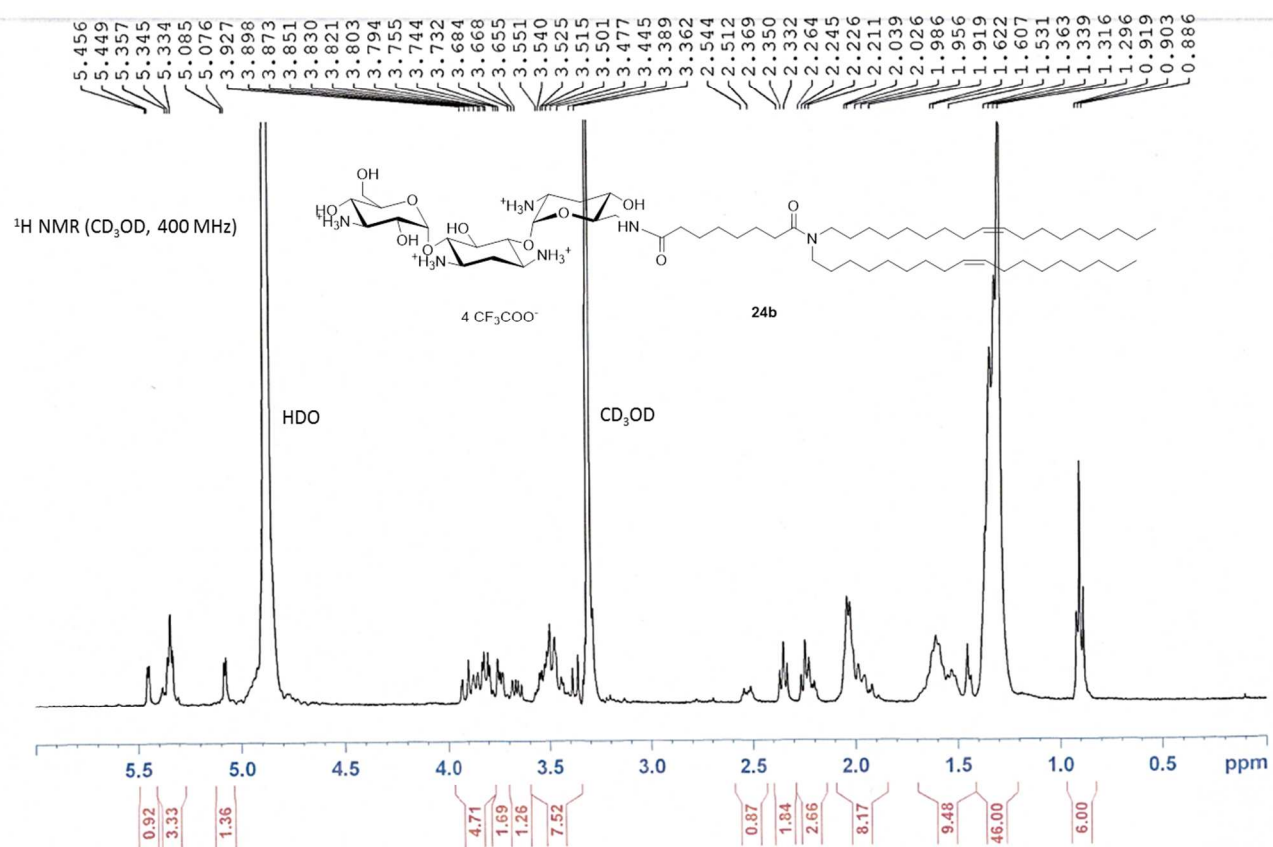

**Figure S11:** <sup>1</sup>H NMR spectrum of **24b**

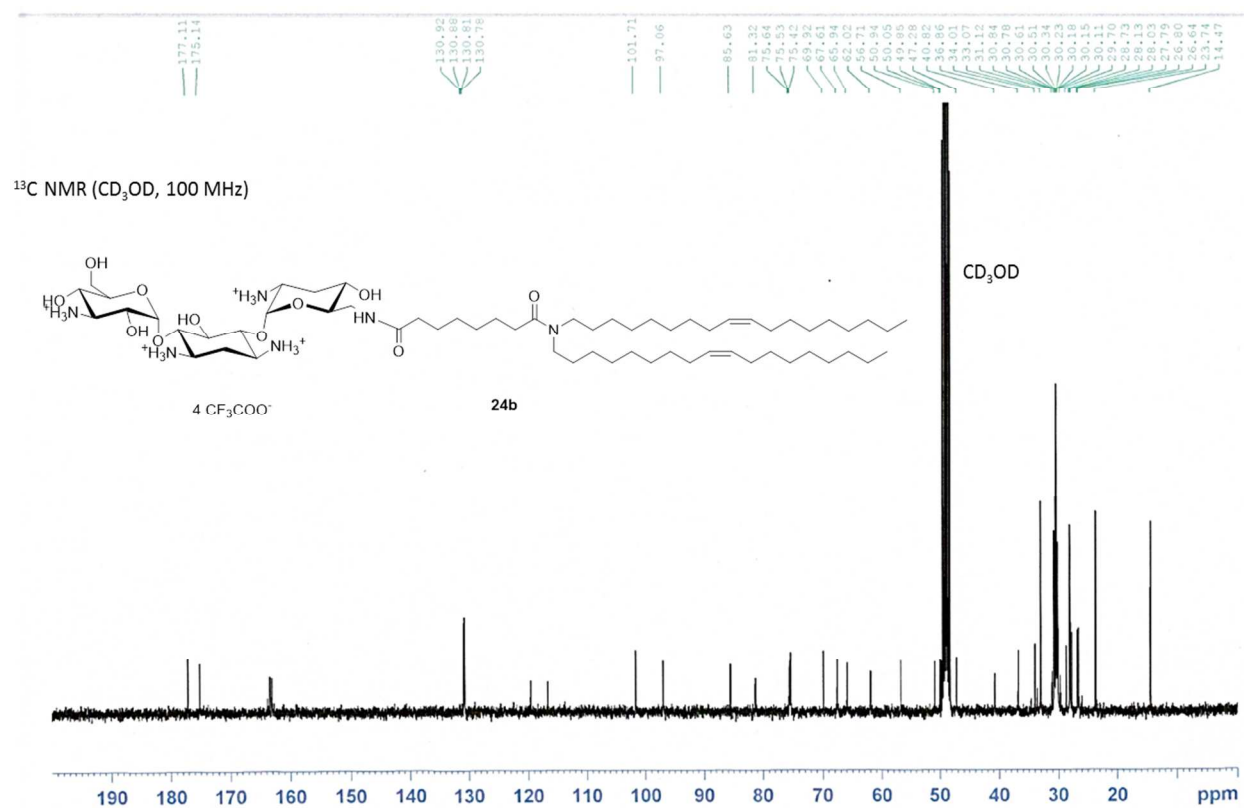

**Figure S12:**  $^{13}\text{C}$  NMR spectrum of **24b**

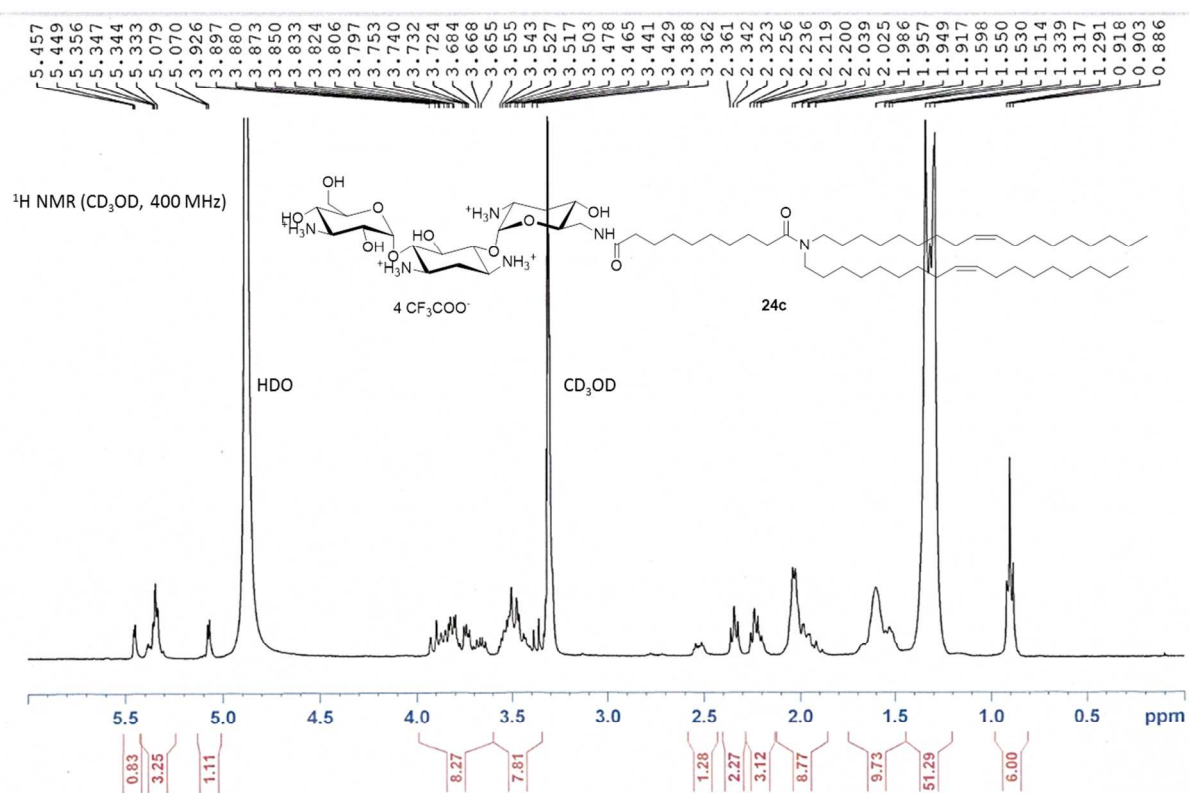

**Figure S13:**  $^1\text{H}$  NMR spectrum of **24c**



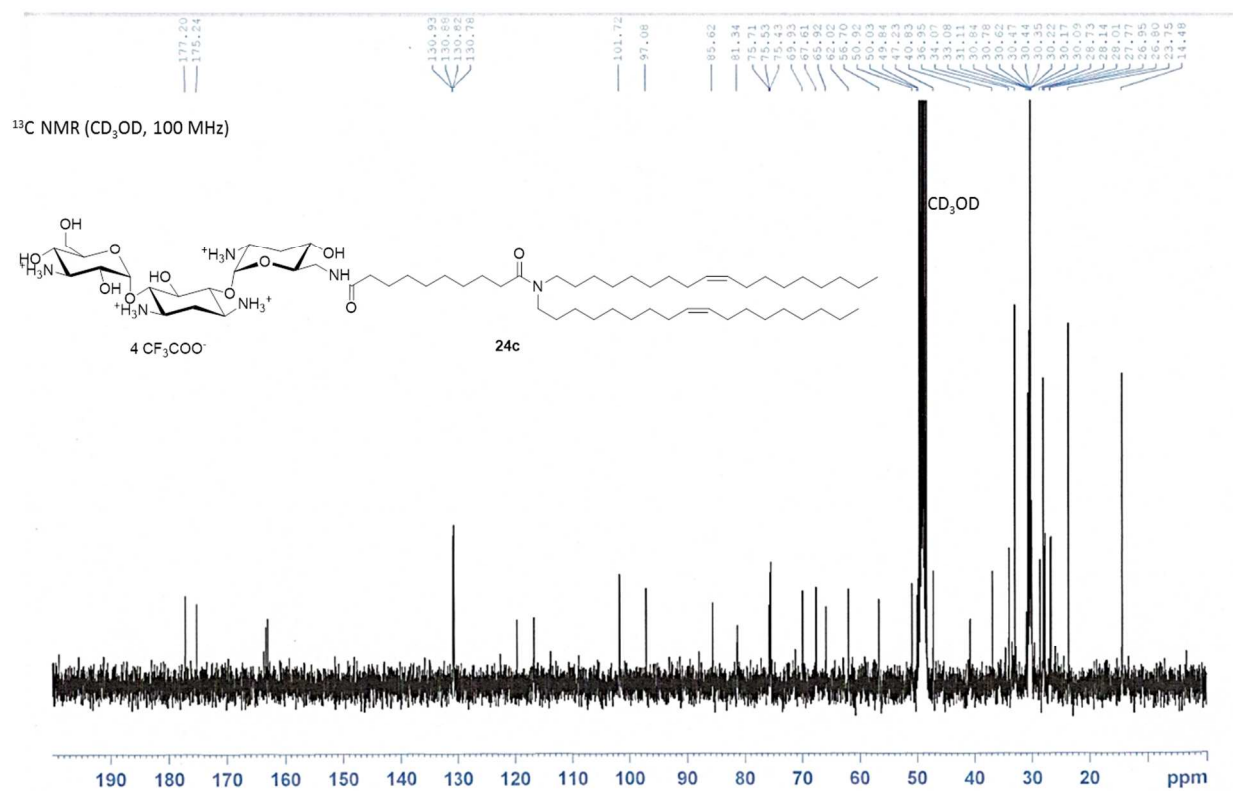

**Figure S14:**  $^{13}\text{C}$  NMR spectrum of **24c**

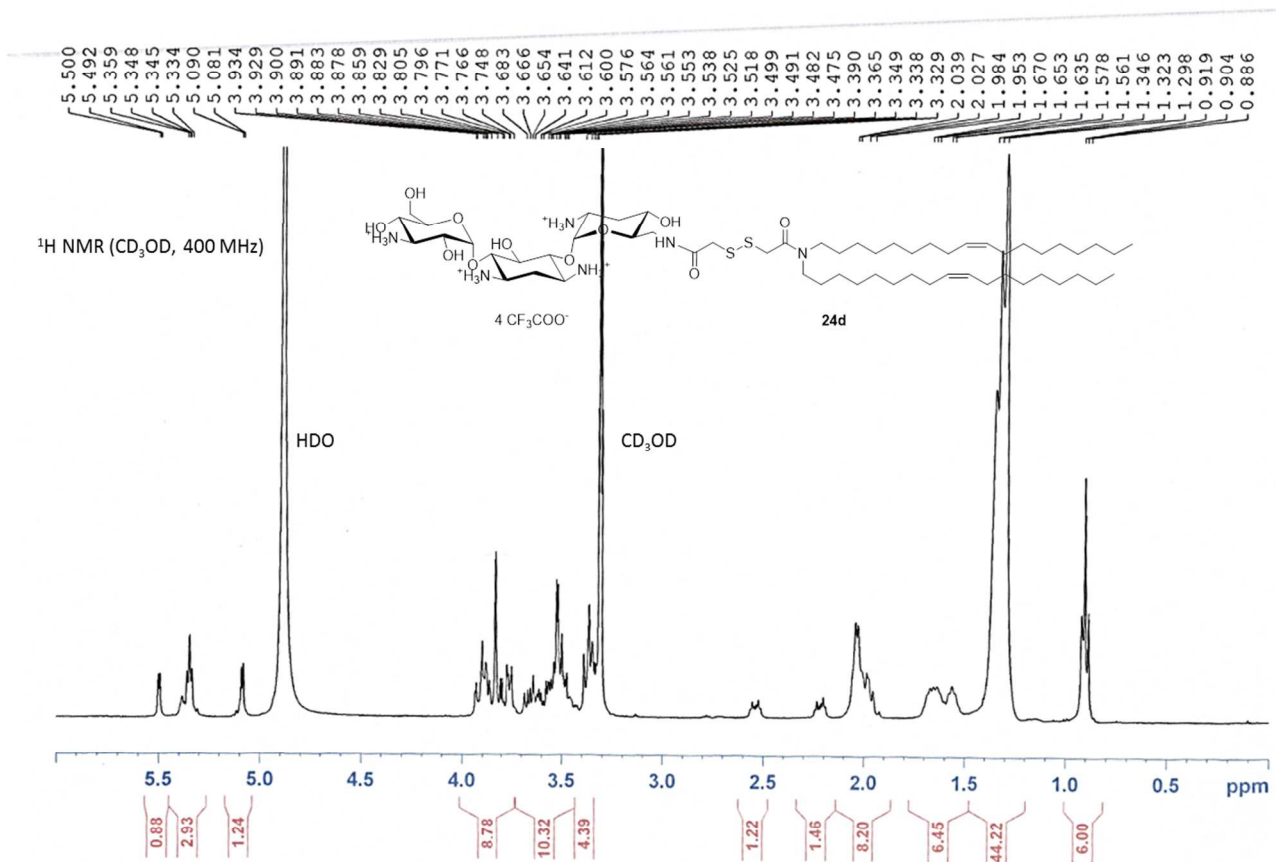

**Figure S15:**  $^1\text{H}$  NMR spectrum of **24d**

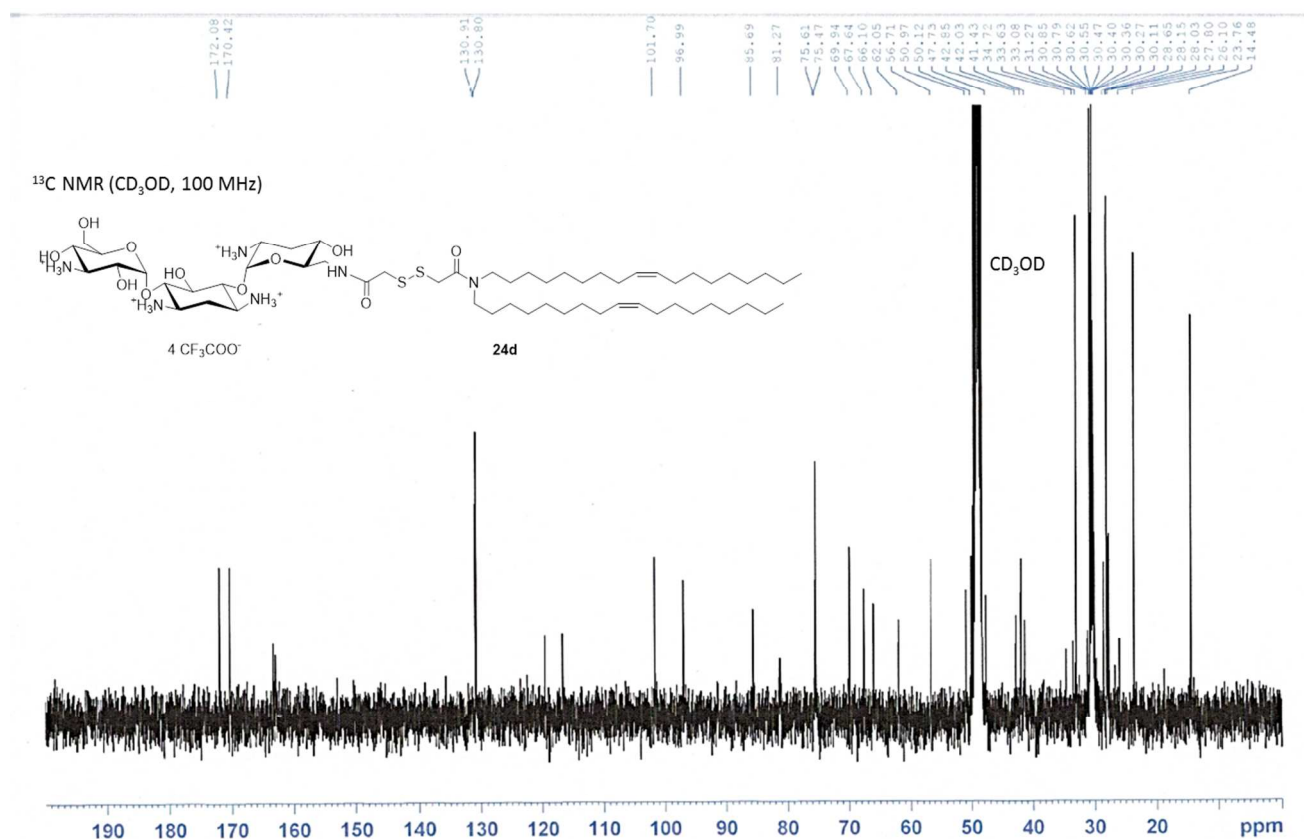

**Figure S16:**  $^{13}\text{C}$  NMR spectrum of **24d**

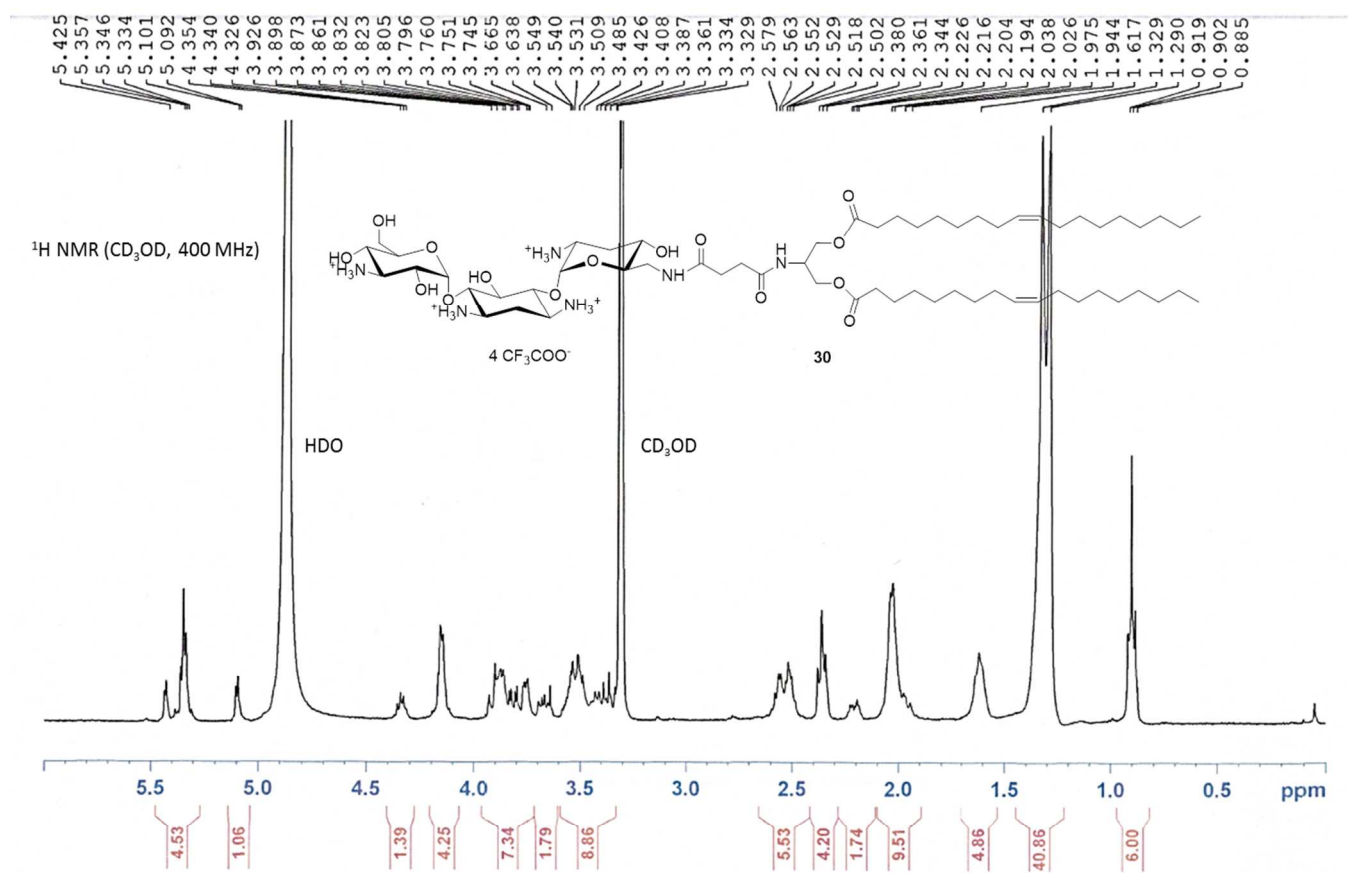

**Figure S17:**  $^1\text{H}$  NMR spectrum of **30**

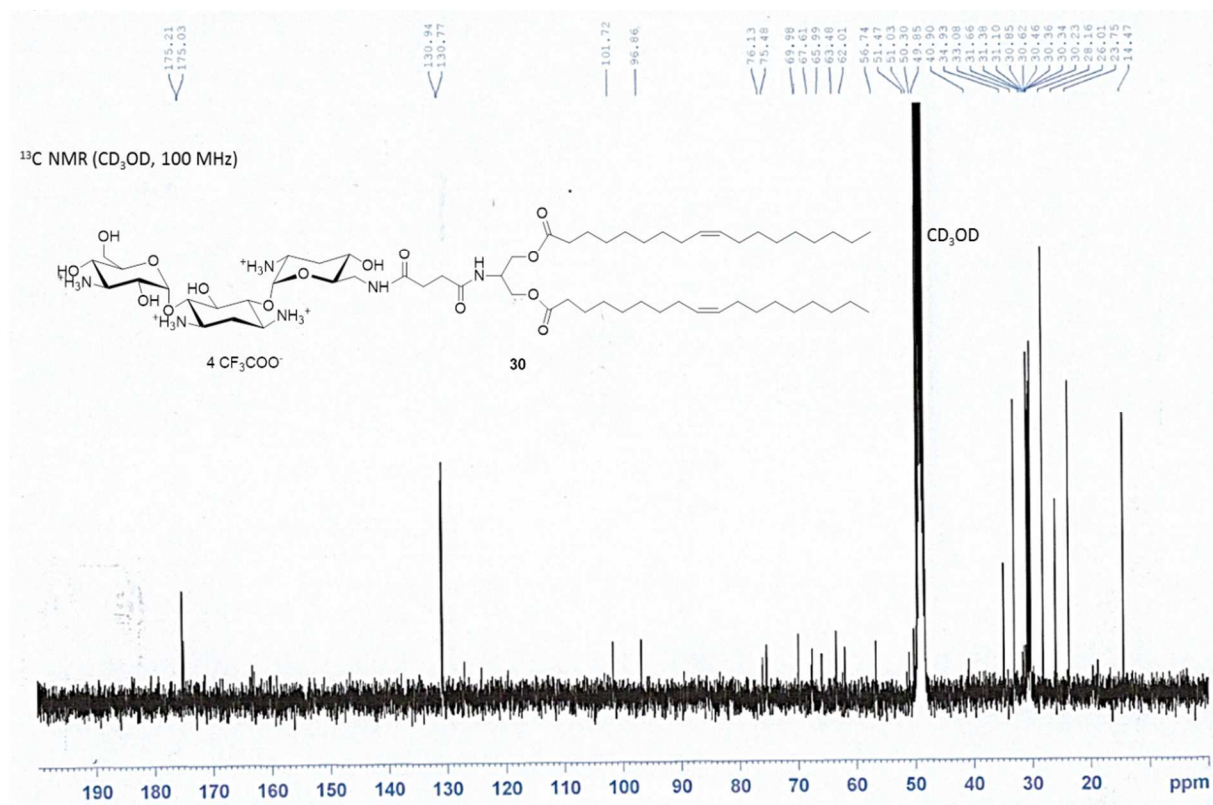

**Figure S18:**  $^{13}\text{C}$  NMR spectrum of **30**

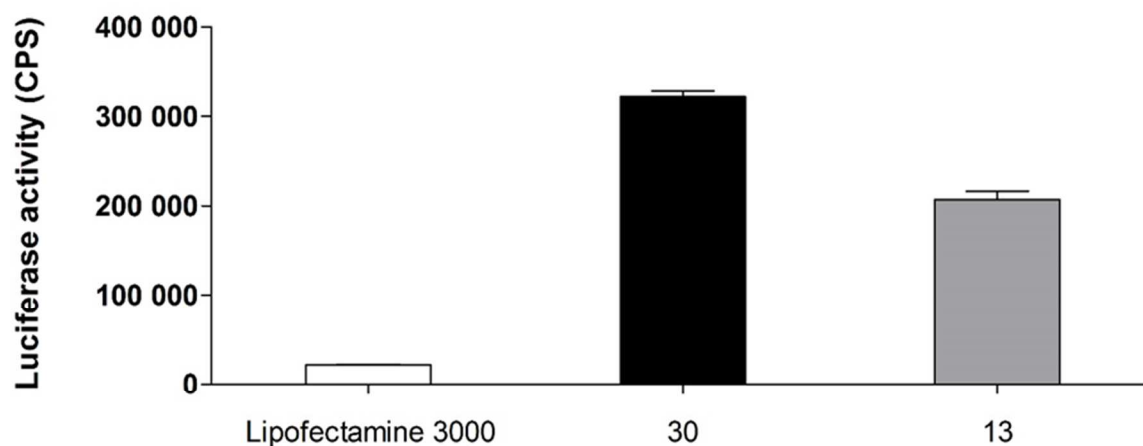

**Figure S19:** *In vitro* transfection of plasmid DNA encoding luciferase in HeLa cell line. Cells were transfected with 0.5  $\mu$ g of DNA formulated with Lipofectamine 3000 (as recommended by the provider, white), DOSST **30** (black) or DOST **13** (grey) at a charge ratio of 5. Data represent mean,  $\pm$  SEM, luciferase activity in count per second (CPS) 24 h post-transfection.

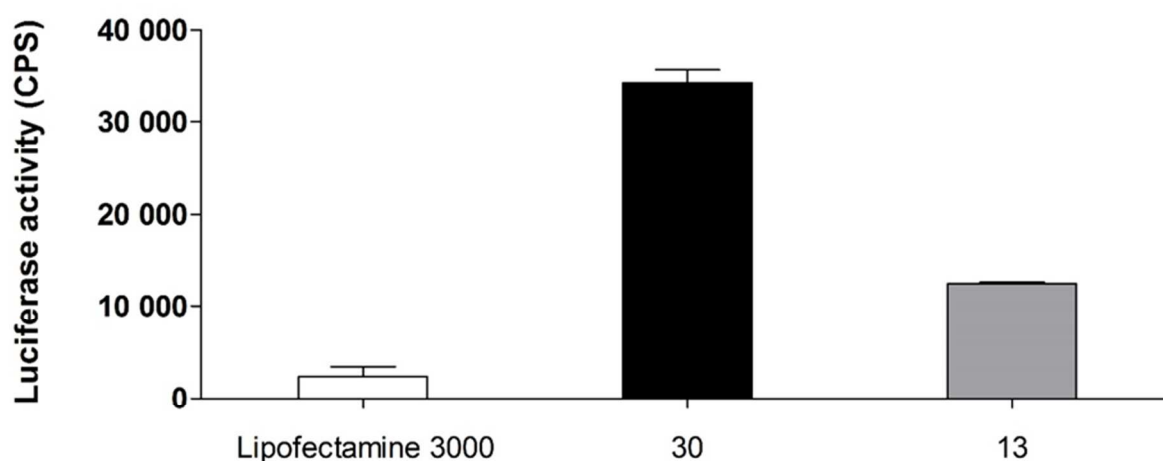

**Figure S20:** *In vitro* transfection of mRNA encoding luciferase in HeLa cell line. Cells were transfected with 0.5  $\mu$ g of mRNA formulated with Lipofectamine 3000 (as recommended by the provider, white), DOSST **30** (black) or DOST **13** (grey) at a charge ratio of 5. Data represent mean,  $\pm$  SEM, luciferase activity in count per second (CPS) 24 h post-transfection.

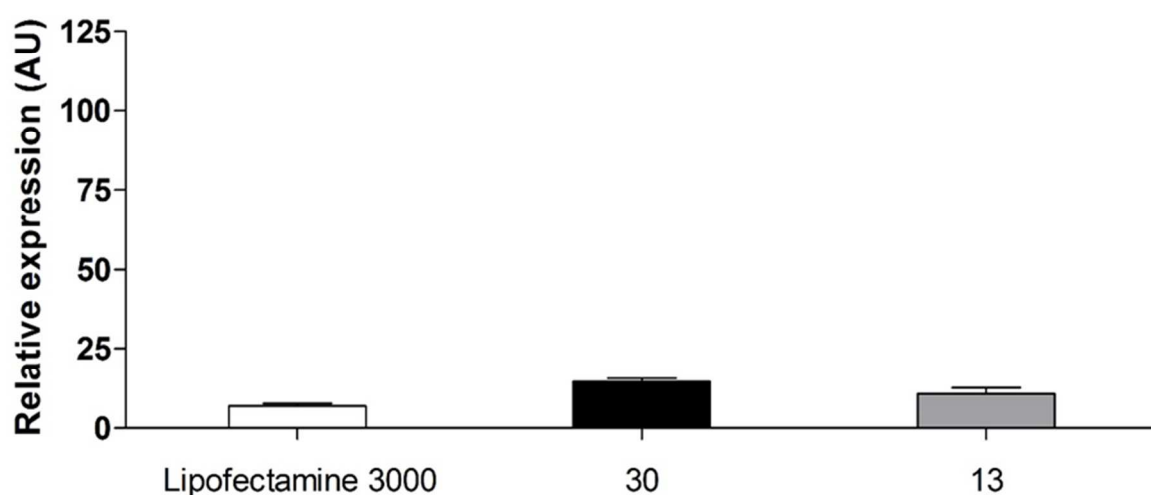

**Figure S21:** Inhibition of LaminA/C expression in HeLa cell line. Cells were transfected with 150 ng of siRNA formulated with Lipofectamine 3000 (as recommended by the provider, white), DOSST **30** (black) or DOST **13** (grey) at a charge ratio of 5. After 24 h, the gene expression levels of LaminA/C were measured by qPCR analysis, normalized against the expression levels of HPRT (housekeeping gene). The results are expressed as the  $2^{-\Delta\Delta CT}$  formula. Bars represent mean values  $\pm$  SEM.

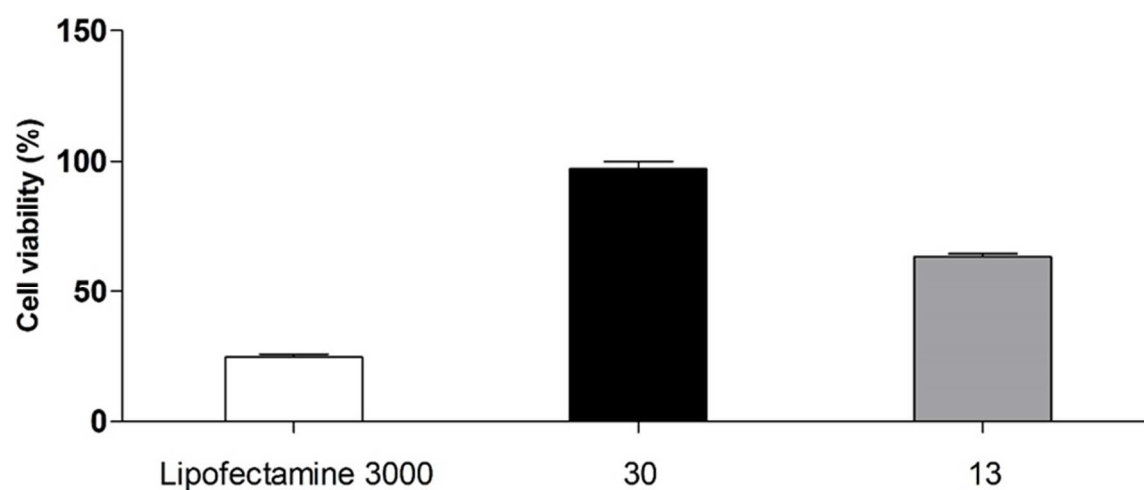

**Figure S22:** Percentage of cell survival in HeLa cell line. Cells were transfected with 0.5  $\mu$ g of DNA formulated with Lipofectamine 3000 (as recommended by the provider, white), DOSST **30** (black) or DOST **13** (grey) at a charge ratio of 5. After 24 h, cytotoxicity was evaluated by Cell titer 96 Non-radioactive cell proliferation assay. Data represent mean  $\pm$  SEM.
